# Supplementary material for: Plant-Community Vulnerability in Highly Fragmented Landscapes Is Higher in Secondary Forests Than in Old Growth Forests in the Andean–Amazonian Transition
Source: MDPI journal article supplement (doi:10.3390/plants11233284), 2022-11-29
Supplement: s1 [file s1]

# Higher functional diversity in secondary forests increases plant-community vulnerability in highly fragmented landscapes in the Andean-Amazonian transition

Carlos H. Rodríguez-León <sup>1,2</sup>, Lilia L. Roa-Fuentes <sup>3,\*</sup>, Armando Sterling <sup>2,4,\*</sup>, Juan Carlos Suárez <sup>5</sup>

<sup>1</sup> Doctorado en Ciencias Naturales y Desarrollo Sustentable, Facultad de Ciencias Agropecuarias, Universidad de la Amazonía, Florencia 180001, Caquetá, Colombia

<sup>2</sup> Programa Modelos de Funcionamiento y Sostenibilidad, Instituto Amazónico de Investigaciones Científicas SINCHI, Florencia 180001, Caquetá, Colombia

<sup>3</sup> Departamento de Ecología y Territorio, Facultad de Estudios Ambientales y Rurales, Pontificia Universidad Javeriana, Bogotá 110231, Colombia

<sup>4</sup> Programa de Biología, Facultad de Ciencias Básicas, Universidad de la Amazonía, Florencia 180001, Caquetá, Colombia

<sup>5</sup> Laboratorio de Ecofisiología, Centro de Investigaciones Amazónicas CIMAZ-MACAGUAL, Universidad de la Amazonía, Florencia 180001, Caquetá, Colombia

\* Correspondence: lilia.roa@javeriana.edu.co (L.L.R.-F.); asterling@sinchi.org.co (A.S.)

## Supplementary Figures

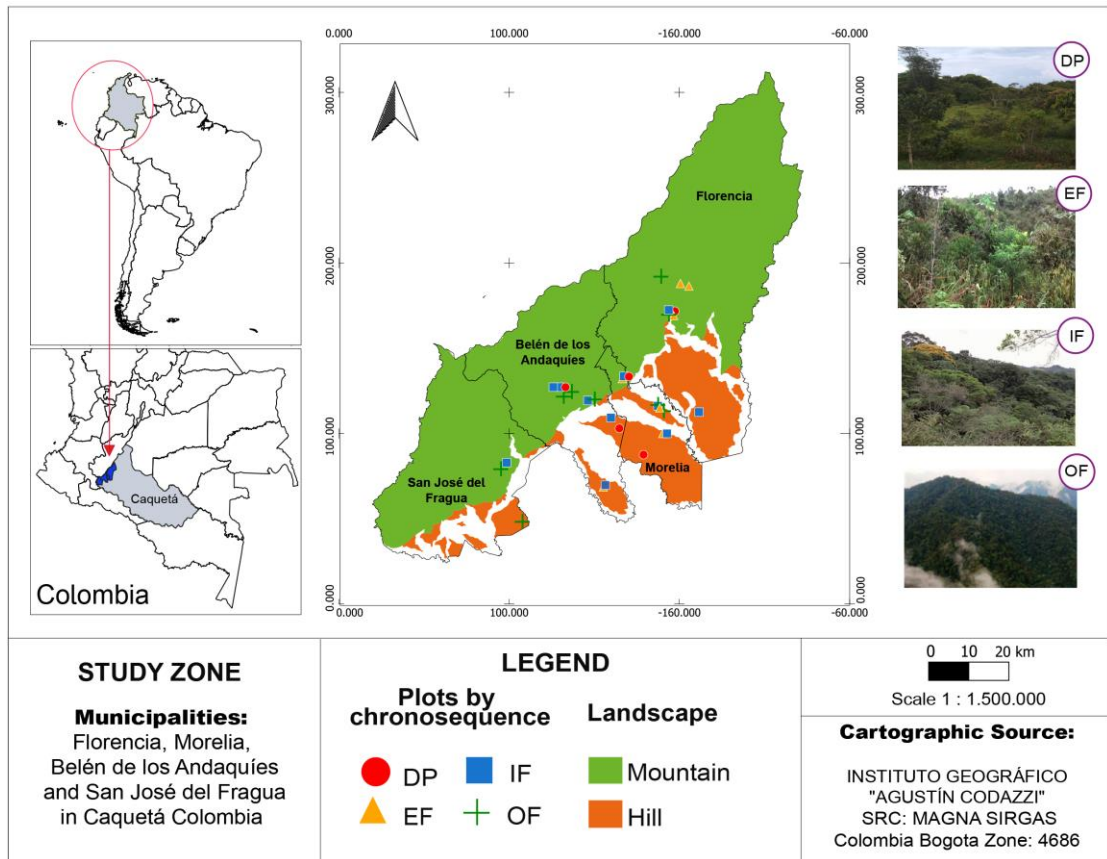

**Figure S1.** Location of the study zone and plots (northwest of Caquetá state, Colombian Andean-Amazonian transition). DP, degraded pasture; EF, early forest; IF, intermediate forest; OF, old-growth forest.

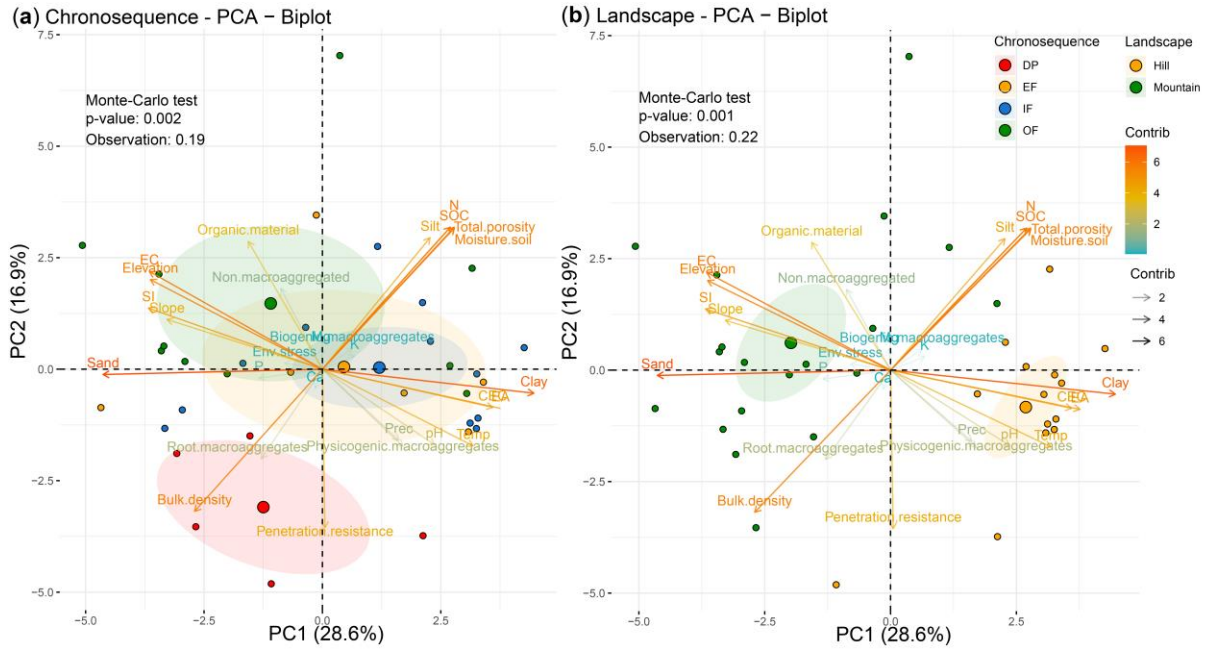

**Figure S2.** Principal component analysis (PCA) with 28 above and belowground environmental parameters and the sampling plots projected on the ordination plane PC1/PC2. The color of the vectors indicates the contribution of the variables to the PCs; 95% confidence ellipses. **(a)** and **(b)**, sampling plots grouped by chronosequence (DP, degraded pasture; EF, early forest; IF, Intermediate forest; OF, Old-growth forest or mature forest) and landscape (Hill and mountain), respectively.

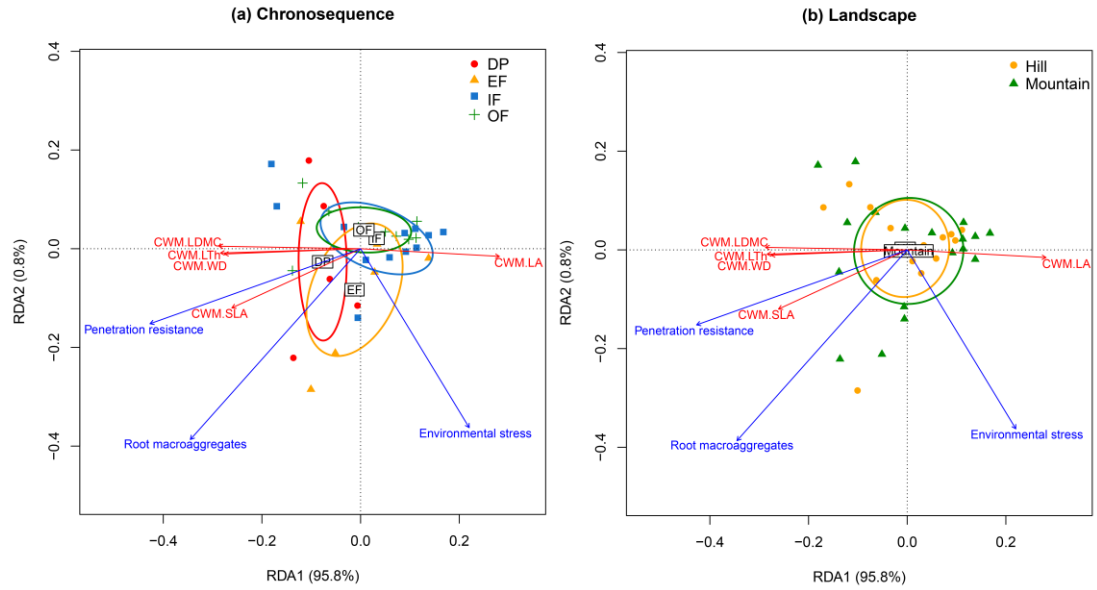

**Figure S3.** Redundancy analysis (RDA) of community-weighted means (CWMs) of plant traits associated with different successional categories or landscape units, constrained by above- and below-ground environmental parameters. **(a)** successional categories (DP, degraded pasture; EF, early forest; IF, Intermediate forest; OF, Old-growth forest or mature forest; **(b)** landscape units. Ellipses represent the standard deviation around the centroid of each category or landscape.

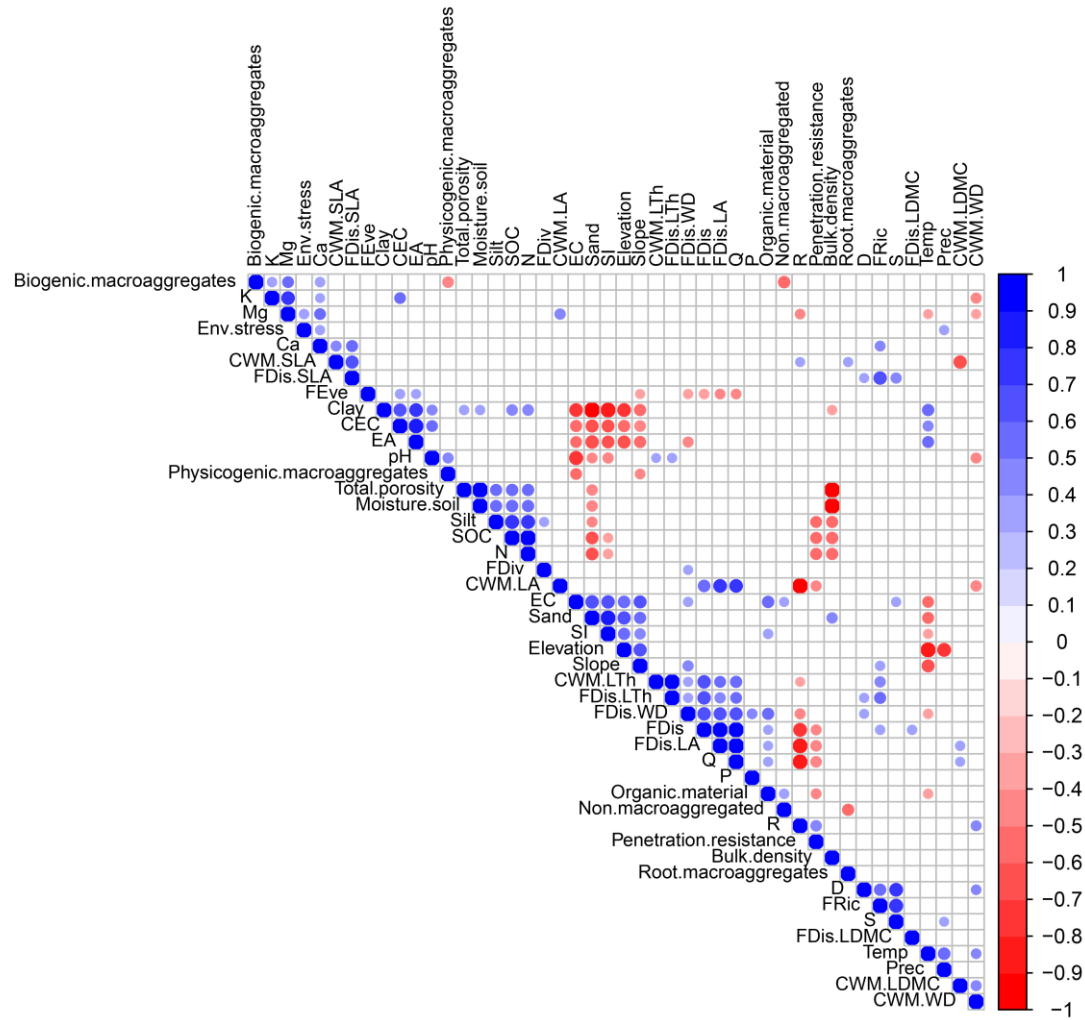

**Figure S4.** Correlogram of Pearson's correlation coefficients between functional and above and belowground environmental variables. Significant correlations ( $p < 0.05$ ) are represented by blue (positive) and red (negative) filled circles. Size and color intensity of the circles indicate the strength of correlation.

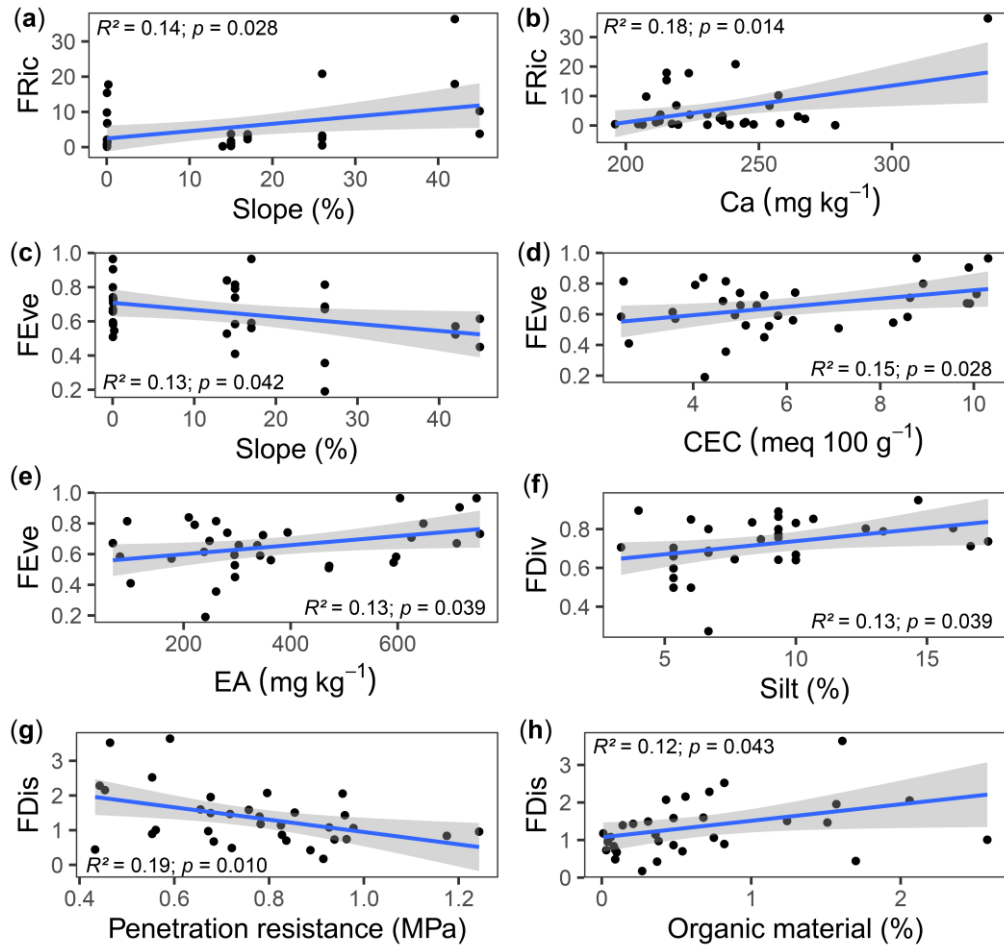

**Figure S5.** Linear regressions with permutation tests for different functional diversity aspects vs. above- and below-ground environmental parameters during the secondary succession. Blue line represents the fitted model, and grey band represents the 95% confidence interval. (a)  $FRic$  vs. slope; (b)  $FRic$  vs.  $Ca$ ; (c)  $FEve$  vs. slope; (d)  $FEve$  vs.  $CEC$ ; (e)  $FEve$  vs.  $EA$ ; (f)  $FDiv$  vs. silt; (g)  $FDis$  vs. penetration resistance; (h)  $FDis$  vs. organic material.

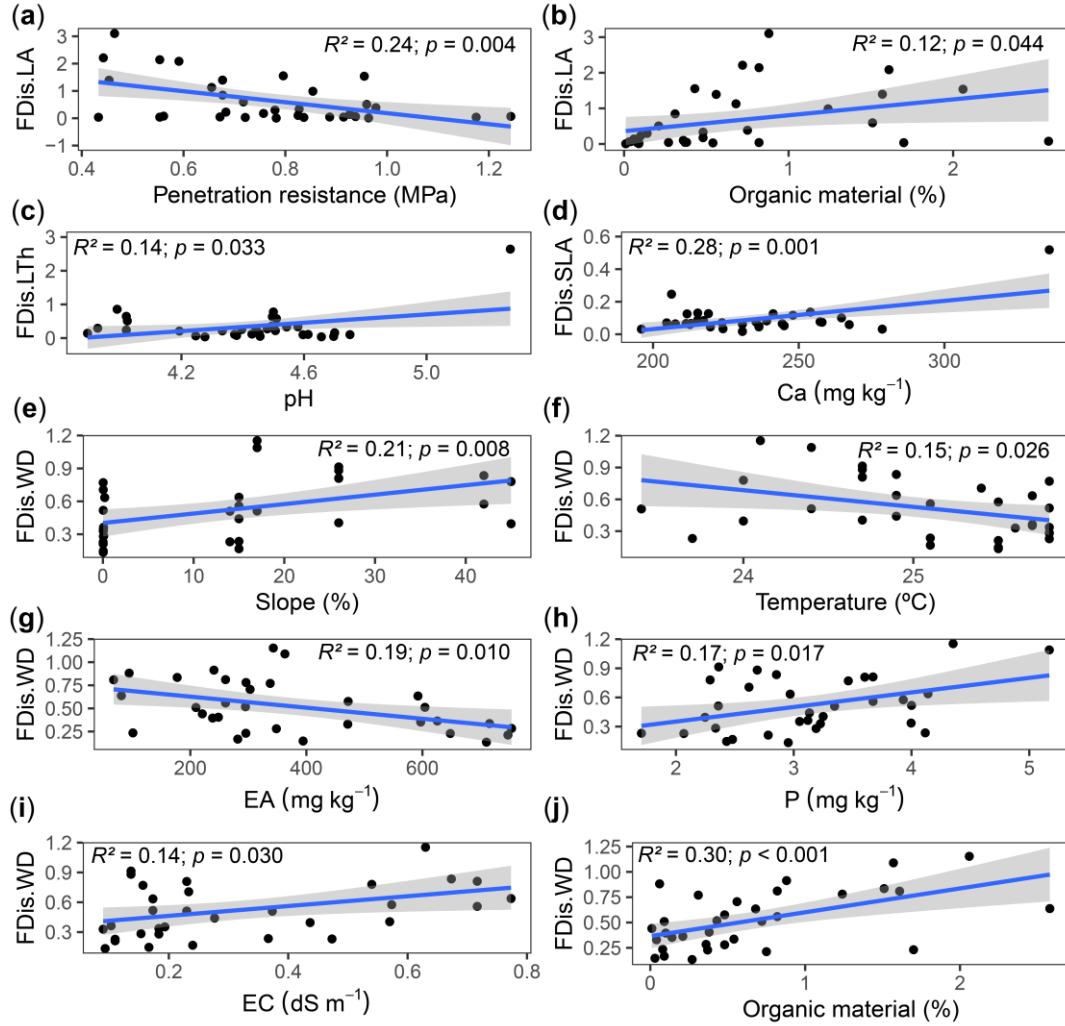

**Figure S6.** Linear regressions with permutation tests for functional dispersion (FDis) of individual plant traits vs. above and belowground environmental parameters during the secondary succession. (a) FDis.LA vs. penetration resistance; (b) FDis.LA vs. organic material; (c) FDis.LTh vs. pH; (d) FDis.SLA vs. Ca; (e) FDis.WD vs. slope; (f) FDis.WD vs. temperature; (g) FDis.WD vs. EA; (h) FDis.WD vs. P; (i) FDis.WD vs. EC; (j) FDis.WD vs. organic material.

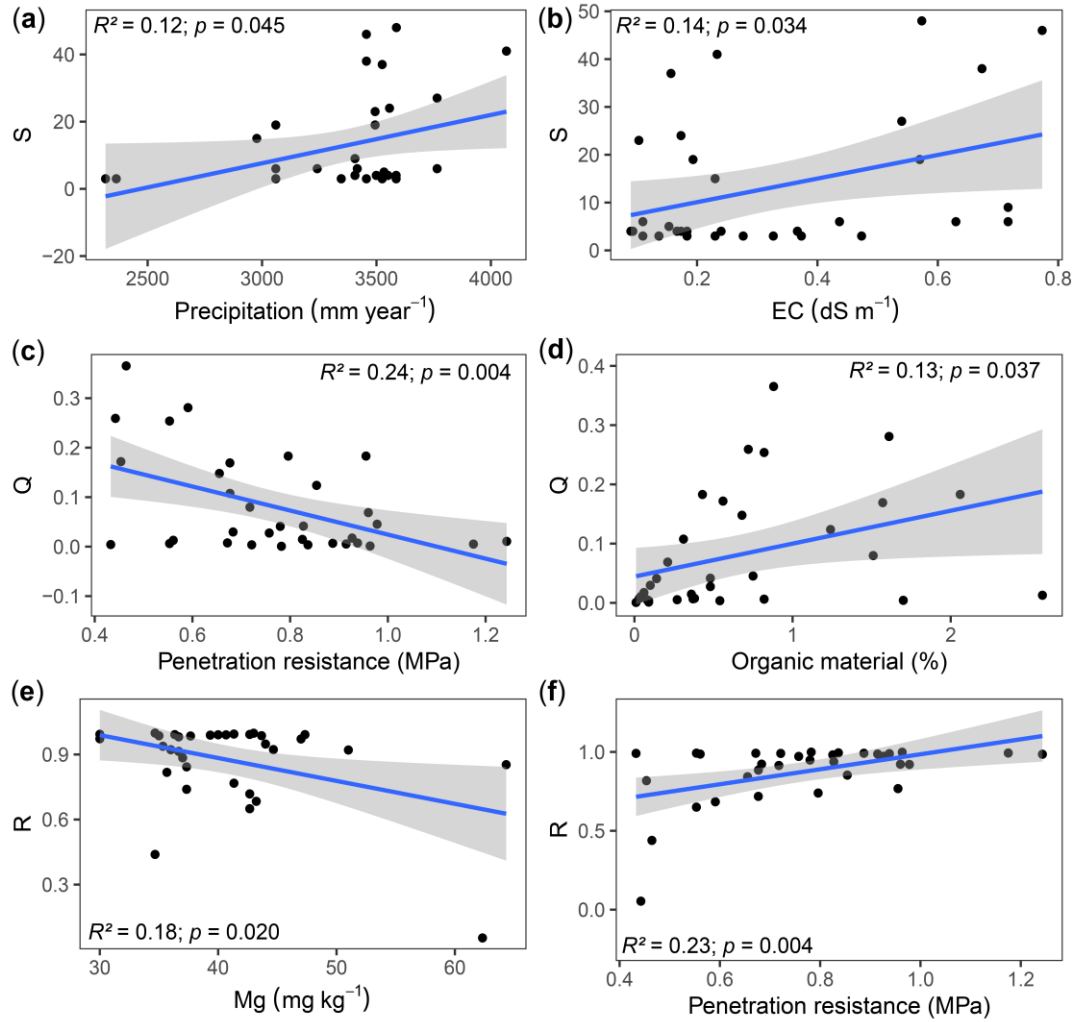

**Figure S7.** Linear regressions with permutation tests for different attributes functional vulnerability-related vs. above- and below-ground environmental parameters during the secondary succession. Blue line represents the fitted model and grey bands the 95% confidence interval. (a) Species richness ( $S$ ) vs. precipitation; (b)  $S$  vs. conductivity electric (CE); (c) Rao quadratic diversity ( $Q$ ) vs. penetration resistance; (d)  $Q$  vs. organic material; (e) Functional redundancy ( $R$ ) vs. Mg; (f)  $R$  vs. penetration resistance.
